# Supplementary material for: Ambulatory Patients with Cardiometabolic Disease and Without Evidence of COVID-19 During the Pandemic. The CorCOVID LATAM Study
Source: PubMed Central journal article supplement (PMC7894376; doi:10.5334/gh.932), 2021-02-17
Supplement: gh-16-1-932-s1.pdf [file gh-16-1-932-s1.pdf]

## ***Status of patients with cardiovascular disease in the pandemic context***

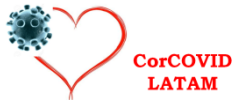

---

*Initials:*

*Date of birth:*

*Sex:*

- Male*
- Female*

*Education level*

- None*
- Primary school*
- High school*
- Tertiary*
- College*

*Occupation*

- Housekeeper*
- Employee*
- Independent contractor*
- Academic degree*
- Retired*
- Unemployed*

*Income level*

- Very Low (NOT COVER BASIC NEEDS AND REQUIRES SOCIAL SUPPORT)*
- Low (COVER ONLY BASIC NEEDS AND MEDICATIONS)*
- Middle (EXCEEDS BASIC NEEDS AND ALLOWS SAVINGS)*
- High*

*Size of your home based on number of rooms*

- 1*
- 2*
- 3*
- 4*
- 5 or more*

*How many people do you live with?*

- None*
- 1 ó 2*
- 3 ó 4*
- 5 ó 6*
- 7 or more*

*Cardiovascular history*

- Stroke*
- Peripheral vascular disease*
- Coronary disease*
- Diabetes*
- Hypertension*
- Dyslipidemia*
- Heart failure*
- Cardiomyopathy*
- Valvular heart disease*
- Arrhythmias*
- Cardiac devices*
- Other*

*Last hospitalization due to a cardiovascular event*

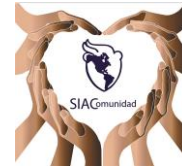

- Never*
- 2020*
- 2019*
- 2018*
- 2017 or Earlier*

*Number of pills taken per day*

- 1 to 4*
- 5 to 8*
- 9 to 12*
- More than 12*

**THE FOLLOWING QUESTION REFER TO THE LAST 30 DAYS**

*How often have you been physically active? (Any activity that involves movement including dance)*

- Never*
- Less than 3 times per week*
- 3 or more times per week*
- Everyday*

*Weekly amount in minutes of physical activity*

- Less than 100 minutes*
- 100 to 150 minutes*
- 150 to 200 minutes*
- More than 200 minutes*

*Physical activity made*

- It has been less than in the previous months*
- It has been the same as in the previous months*
- It has been more than in the previous months*

*Have you used any tutorial or phone app for training?*



- Yes
- No

*How often have you smoke?*

- None
- 1 to 10
- 10 to 20
- More than 20

*If you have smoked*

- It has been less than in previous months
- It has been the same as in previous months
- It has been more than in previous months

*If you have smoked. Have you considered Smoking cessation because of Coronavirus?*

- Yes
- No

*Did you consume any kind of alcoholic drink?*

- Yes
- No

*What kind of alcoholic drink?*

- Wine
- Beer
- Spirit
- Other

*How often did you drink alcoholic beverages?*

- Occasionally
- Every week
- Almost everyday
- Everyday

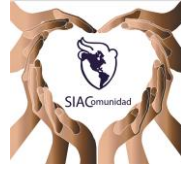

*If you have drunk*

- It has been less than in previous months*
- It has been the same as in previous months*
- It has been more than in previous months*

*Have you eaten fruits and vegetables?*

- Rarely*
- 1 to 3 times per week*
- 4 to 6 times per week*
- Everyday*

*How many servings of fruits and vegetables have you eaten in one day (average)?*

- 1*
- 2 or 3*
- 4 or 5*
- More than 5*

*How much food have you eaten (all types of food)?*

- It has been less than in previous months*
- It has been the same as in previous months*
- It has been more than in previous months*

*Are you weighing yourself at home?*

- Yes*
- No*

*In your perception*

- Has gained weight*
- My weight has not changed*
- Has lost weight*

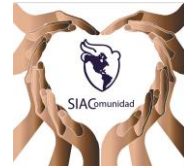

*Have you had any problems accessing your medication?*

- Yes
- No

*Have you stopped any medications due to problems getting them?*

- Yes
- No

*Have you received flu shot?*

- Yes
- No

*Have you received pneumococcal vaccination in the last 3 years?*

- Yes
- No

*Have you made any medical consultation in person, by phone or computer?*

- Yes
- No

*Have you done new activities this month like arts and crafts, reading books, hobbies?*

- Yes
- No

*Have you been interested in activities you usually like to do?*

- Yes
- No

*Have you been feeling depressed?*

- Yes
- No

*Have you felt tired or less energetic?*

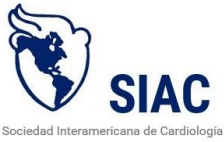

- Yes
- No



*Have you had trouble concentrating on work or watching television?*

- Yes
- No

*Do you look for pandemic news on TV or online newspapers?*

- Never
- 1 to 3 times per week
- 4 a 6 times per week
- Everyday
- Several times each day

*Have you had trouble getting a proper rest due to wakefulness, insomnia?*

- Yes
- No

*When you wake up in the morning. Do you feel that you rested well?*

- Yes
- No
